# Supplementary material for: Four North American glaciers advanced past their modern positions thousands of years apart in the Holocene
Source: Copernicus journal article supplement (doi:10.5194/egusphere-2023-859), 2023-05-25
Supplement: Supplementary file 1 [file egusphere-2023-859-supplement-version3.zip]

Archive with 6 entries (6 files):
- Jones_Supplement_Revised.pdf
- Table S1 14C and 10Be sample data.xlsx
- Table S2 10Be Laboratory Measurement details.xlsx
- Table S3 10Be blank data.xlsx
- Table S4 14C laboratory measurement details.xlsx
- Table S5. Glacier area calculations and details..xlsx
