# Supplementary material for: Four North American glaciers advanced past their modern positions thousands of years apart in the Holocene
Source: Copernicus journal article supplement (doi:10.5194/egusphere-2023-859), 2023-05-25
Supplement: Supplementary file 1 [file egusphere-2023-859-supplement-version3.zip › Table S1 14C and 10Be sample data.xlsx]

## Sheet: Sheet1
Table S1. 14C and 10Be sample data. All uncertainties are 1σ.
Sample	Latitude (DD)	Longitude (DD)	Elevation (m asl)	Thickness (cm)	Shielding
Juneau Ice Field (JIF) Glacier
JIF-01	59.4851	-134.918	1160	3.08513	0.9846
JIF-02	59.4821	-134.918	1160	8.16275	0.9836
JIF-03	59.4861	-134.918	1172	2.89438	0.9813
JIF-04	59.4835	-134.919	1132	2.6145	0.9885
JIF-05	59.4835	-134.919	1132	7.232	0.9905
JIF-06	59.4836	-134.917	1138	3.647	0.9801
JIF-07	59.4839	-134.917	1140	2.74975	0.9738
JIF-08	59.4843	-134.917	1149	3.2885	0.9817
JIF-09	59.4843	-134.917	1151	5.40062	0.983
Kokanee Glacier
KG-01	49.759	-117.167	2462	2.5	0.936847
KG-02	49.759	-117.168	2476	3.5	0.936847
KG-03	49.7596	-117.166	2469	2	0.943173
KG-04	49.7583	-117.165	2538	3	0.958835
KG-05	49.7585	-117.165	2536	2.5	0.954469
KG-06	49.7589	-117.166	2502	2	0.95538
Mammoth Glacier
MG-01	43.1754	-109.67	3516	2.75	0.979446
MG-02	43.1754	-109.67	3509	2.5	0.979102
MG-03	43.1758	-109.671	3496	2	0.97813
MG-04	43.1784	-109.673	3433	2	0.978492
MG-05	43.1788	-109.674	3435	2.5	0.978492
Conness Glacier
CG-01	37.9679	-119.313	3547	1.5	0.952707
CG-02	37.9684	-119.314	3536	2.5	0.962378
CG-03	37.9682	-119.315	3555	1	0.933115
CG-04	37.9687	-119.318	3536	2	0.915373
CG-05	37.9688	-119.318	3529	3	0.931673
CG-06	37.9687	-119.319	3537	2	0.920605
