# Supplementary material for: Four North American glaciers advanced past their modern positions thousands of years apart in the Holocene
Source: Copernicus journal article supplement (doi:10.5194/egusphere-2023-859), 2023-05-25
Supplement: Supplementary file 1 [file egusphere-2023-859-supplement-version3.zip › Table S2 10Be Laboratory Measurement details.xlsx]

## Sheet: Sheet1
Table S2. 10Be laboratory measurement details. All uncertainties are 1σ.
Sample	Quartz Mass (g)	Be Added (g)	10Be/9Bea (10-13)	Uncertainty (10-15)	10Be Blank
Juneau Ice Field Glacier
JIF-001	30.1262	0.2534	0.719	4.98	BLK_092320
JIF-002	6.5279	0.2524	0.142	2.1	BLK_092320
JIF-003	12.448	0.2515	0.0383	0.99	BLK_092320
JIF-004	30.175	0.2512	0.883	4.42	BLK_092320
JIF-005	30.2996	0.2505	0.682	3.97	BLK_092320
JIF-006	30.6159	0.2499	0.0704	1.25	BLK_092320
JIF-007	30.2047	0.2481	0.216	2.21	BLK_092320
JIF-008	30.2035	0.25	0.545	4.37	BLK_092320
JIF-009	30.4616	0.2501	0.746	4.51	BLK_092320
Kokanee Glacier
KG-01	20.0064	0.1946	1.26	4.41	29_1, 29_2
KG-02	20.0836	0.1952	1.16	4.21	29_1, 29_2
KG-03	17.246	0.1949	1.41	4.55	29_1, 29_2
KG-04	20.0766	0.1949	2.12	5.76	29_1, 29_2
KG-05	20.007	0.1945	2.66	6.69	29_1, 29_2
KG-06	20.0311	0.1944	1.9	5.1	29_1, 29_2
Mammoth Glacier
MG-01	34.8843	0.1918	9.12	26.3	31_1, 31_2
MG-02	38.0706	0.1928	14.9	42.3	31_1, 31_2
MG-03	34.6902	0.193	11.4	26.3	31_1, 31_2
MG-04	24.4404	0.1924	0.62	4.29	31_1, 31_2
MG-05	34.7489	0.1923	6.83	17.6	31_1, 31_2
Conness Glacier
CG-01	20.0062	0.1944	0.109	1.13	29_1, 29_2
CG-02	20.0034	0.1937	0.0926	1.08	29_1, 29_2
CG-03	14.674	0.195	0.0546	0.765	29_1, 29_2
CG-04	20.0049	0.1945	0.0357	0.748	29_1, 29_2
CG-05	20.0256	0.1951	0.0385	0.712	29_1, 29_2
CG-06	20.018	0.1936	0.0426	0.674	29_1, 29_2
aMeasured relative to standard 07KNSTD with an assumed 10Be/9Be ratio of 2.85 x 10-12
(Nishiizumi et al., 2007).
