# Supplementary material for: Four North American glaciers advanced past their modern positions thousands of years apart in the Holocene
Source: Copernicus journal article supplement (doi:10.5194/egusphere-2023-859), 2023-05-25
Supplement: Supplementary file 1 [file egusphere-2023-859-supplement-version3.zip › Table S3 10Be blank data.xlsx]

## Sheet: Sheet1
Table S3. 10Be Blank Data. All uncertainties are 1σ.
Blank ID	Be Added (g)	10Be/9Bea	Uncertainty	10Be (104 atoms)	Uncertainty (104 atoms)
Blank_29_1	0.7648	9.86e-16	4e-16	1.27	0.515
Blank_29_2	0.7698	1.29e-15	3.58e-16	1.67	0.463
Blank_32_1	0.7618	7.52e-16	7.2e-16	0.963	0.922
Blank_32_7	0.767	1.78e-15	7.25e-16	2.29	0.935
BLK_092320b	0.277	1.51e-15	6.1e-16	2.53	1.17
aMeasured relative to standard 07KNSTD with an assumed 10Be/9Be ratio of 2.85 x 10-12
(Nishiizumi et al., 2007).
bCarrier used is TUBe (904 ppm 9Be). All other blanks used OSUWhite (251.6 ppm 9Be)
