# Supplementary material for: Four North American glaciers advanced past their modern positions thousands of years apart in the Holocene
Source: Copernicus journal article supplement (doi:10.5194/egusphere-2023-859), 2023-05-25
Supplement: Supplementary file 1 [file egusphere-2023-859-supplement-version3.zip › Table S4 14C laboratory measurement details.xlsx]

## Sheet: Sheet1
Table S4. 14C laboratory measurement details. All uncertainties are 1σ.
Sample	Quartz Mass (g)	C Yield (μg)	Diluted C (μg)	14C/C	Uncertainty	14C (104 atoms/g)	Uncert. (104 atoms)	Effective Blank (104 atoms)	Uncert. (104 atoms)
Juneau Ice Field Glacier
JIF-01	5.0218	26.9	113.2	7.52e-14	4.64e-16	7.53	0.142	4.77	0.374
JIF-02	3.5704	46.6	115.3	9.45e-14	7.79e-16	13.9	0.254	4.77	0.374
JIF-03	3.6063	120.3	120.3	4.52e-14	4.54e-16	6.16	0.16	4.77	0.374
JIF-04	5.0276	19.3	111.21	1.01e-13	7.8e-16	10.2	0.183	4.77	0.374
JIF-05	4.9143	14	113.3	7.21e-14	4.95e-16	7.35	0.143	4.77	0.374
JIF-06	4.9524	11.1	113.6	3.05e-14	4.42e-16	2.53	0.102	4.77	0.374
JIF-07	4.9232	17.5	113.5	4.08e-14	3.82e-16	3.74	0.107	4.77	0.374
JIF-08	4.9016	21.7	114.7	6.09e-14	4.97e-16	6.15	0.132	4.77	0.374
JIF-09	4.9644	7.9	113.7	5.77e-14	5.23e-16	5.66	0.128	4.77	0.374
Kokanee Glacier
KG-01	4.72	7	111.4	1.01e-13	6.22e-16	10.9	0.187	4.77	0.374
KG-02	5.0853	4.8	97.5	8.19e-14	5.14e-16	6.89	0.134	4.77	0.374
KG-03	2.8927	3.7	94.2	7.28e-14	5.39e-16	10.2	0.218	4.77	0.374
KG-04	5.0205	4.1	113.2	1e-13	6.52e-16	10.3	0.178	4.77	0.374
KG-05	4.0061	3	111.1	9.33e-14	5.38e-16	11.7	0.204	4.77	0.374
KG-06	4.1491	4.3	112.7	9.35e-14	5.46e-16	11.5	0.2	4.77	0.374
Mammoth Glacier
MG-01	4.9461	41	114.9	5e-13	1.76e-15	56.8	0.771	56.8	0.771
MG-02	5.0272	37.3	113.5	5.37e-13	1.93e-15	59.7	0.81	59.7	0.81
MG-03	5.0664	28	111.6	6.01e-13	2.1e-15	65.3	0.883	65.3	0.883
MG-04	4.938	32.3	112.3	8.4e-14	8.96e-16	8.68	0.178	8.68	0.178
MG-05	5.1169	38.9	112.7	4.4e-13	1.6e-15	47.6	0.65	47.6	0.65
Conness Glacier
CG-01	4.9625	4.9	113.6	2.6e-14	3.12e-16	2.65	0.109	1.57	0.474
CG-02	3.9543	3.5	112.7	2.32e-14	5.39e-16	2.91	0.149	1.57	0.474
CG-03	3.6099	2.8	103.5	2.24e-14	3.73e-16	1.59	1.01	5.85	3.64
CG-04	5.1309	3.1	100.4	1.55e-14	2.41e-16	0.374	0.709	5.85	3.64
CG-05	5.0159	3.3	101.6	2.27e-14	2.89e-16	1.13	0.726	5.85	3.64
CG-06	3.9691	3.6	112.9	2.07e-14	3.91e-16	2.55	0.137	1.57	0.474
