# Supplementary material for: Four North American glaciers advanced past their modern positions thousands of years apart in the Holocene
Source: Copernicus journal article supplement (doi:10.5194/egusphere-2023-859), 2023-05-25
Supplement: Supplementary file 1 [file egusphere-2023-859-supplement-version3.zip › Table S5. Glacier area calculations and details..xlsx]

## Sheet: Sheet1
Table S5. Glacier area calculations and details.
Glacier	Year	Areaa (km2)	Change from LIA Area (%)	Citation	Image Source
JIF Glacier	2021	14.05	76.9441	This study	Copernicus
	2003	14.77	80.8872	This Study	Copernicus
	1880	18.26	100	This study	Copernicus
Kokanee Glacier	2021	2.63	39.0788	This Study	Copernicus
	2008	2.77	41.159	This study	Copernicus
	1880	6.73	100	This study	Copernicus
Mammoth Glacier	2014	1.67	48.9736	DeVisser and Fountain, 2015	Maps, aerial photos
	2006	2	58.651	DeVisser and Fountain, 2015	Maps, aerial photos
	2001	2.06	60.4106	DeVisser and Fountain, 2015	Maps, aerial photos
	1994	2.29	67.1554	DeVisser and Fountain, 2015	Maps, aerial photos
	1966	2.54	74.4868	DeVisser and Fountain, 2015	Maps, aerial photos
	1950	2.88	84.4575	DeVisser and Fountain, 2015	Maps, aerial photos
	1880	3.41	100	DeVisser and Fountain, 2015	Maps, aerial photos
Conness Glacier	2021	0.109	16.7692	This study	Copernicus
	2004	0.16	24.6154	Basgaic and Fountain, 2011	Basagic Survey
	1972	0.1977	30.4154	Basgaic and Fountain, 2011	Historical Photo
	1954	0.2304	35.4462	Basgaic and Fountain, 2011	Historical Photo
	1944	0.2611	40.1692	Basgaic and Fountain, 2011	Historical Photo
	1880	0.65	100	This Study	Copernicus
Wind River Range Composite	2006	20.4	55.6313	DeVisser and Fountain, 2015	NA
	2001	21.29	58.0584	DeVisser and Fountain, 2015	NA
	1994	23.37	63.7306	DeVisser and Fountain, 2015	NA
	1966	27.32	74.5023	DeVisser and Fountain, 2015	NA
	1880	36.67	100	DeVisser and Fountain, 2015	NA
Sierra Nevada Synthetic	2004	31.32	44.0011	Basgaic and Fountain, 2011	NA
	1972	39.15	55.0014	Basgaic and Fountain, 2011	NA
	1880	71.18	100	Basgaic and Fountain, 2011	NA
